# Supplementary material for: CTNND2 gene expression in melanoma tissues and its effects on the malignant biological functions of melanoma cells
Source: PubMed Central journal article supplement — Transl Cancer Res. 2024 Nov 27;13(11):6347–63. doi: 10.21037/tcr-24-2159 (PMC11651744; doi:10.21037/tcr-24-2159), 2024-11-27
Supplement: tcr-13-11-6347-dss.pdf [file tcr-13-11-6347-dss.pdf]

## Data Sharing Statement

|                     |                                                                                                                                                     |                                                                                                                       |
|---------------------|-----------------------------------------------------------------------------------------------------------------------------------------------------|-----------------------------------------------------------------------------------------------------------------------|
| <b>Article Info</b> | <a href="https://dx.doi.org/10.21037/tcr-24-2159">https://dx.doi.org/10.21037/tcr-24-2159</a>                                                       |                                                                                                                       |
| <b>Item</b>         | <b>Question</b>                                                                                                                                     | <b>Authors' Response<br/>(place "-" if not applicable)</b>                                                            |
| 1                   | Would you like to share data collected for your study to others?                                                                                    | Yes.                                                                                                                  |
| 2                   | If not, would you like to share the reason for your decision?                                                                                       | -                                                                                                                     |
| 3                   | What data in particular will be shared?                                                                                                             | The clinical trial results, cell experiment results, and animal experiment results of this study can all be analyzed. |
| 4                   | Any other documents will be shared? Such as study protocol, statistical analysis plan, informed consent form, clinical study report, analytic code. | Statistical analysis plan, informed consent form, and clinical study report will also be shared if requested.         |
| 5                   | When will data availability begin?                                                                                                                  | From the publication date.                                                                                            |
| 6                   | When will data availability end?                                                                                                                    | Two years within the publication date, since the technique or survival data may be updated over time.                 |
| 7                   | To whom will you share the data?                                                                                                                    | Scholars interested in biomarker research for melanoma.                                                               |
| 8                   | For what type of analysis or purpose?                                                                                                               | For studying biomarkers and targeted therapy for melanoma.                                                            |
| 9                   | How or where can the data/documents be obtained?                                                                                                    | Emails could be sent to the address below to obtain the shared data: ydzhangq@126.com                                 |
| 10                  | Any other restrictions?                                                                                                                             | We may balance the potential benefits and risks for each request and then provide the data that could be shared.      |
